# Supplementary material for: Xylan-Based Hydrogels as a Potential Carrier for Drug Delivery: Effect of Pore-Forming Agents
Source: MDPI journal article supplement (doi:10.3390/pharmaceutics10040261), 2018-12-05
Supplement: s1 [file s1]

# Supplementary Materials: Xylan-Based Hydrogels as a Potential Carrier for Drug Delivery: Effect of Pore-Forming Agents

Minmin Chang, Xinxin Liu, Ling Meng, Xiaohui Wang and Junli Ren

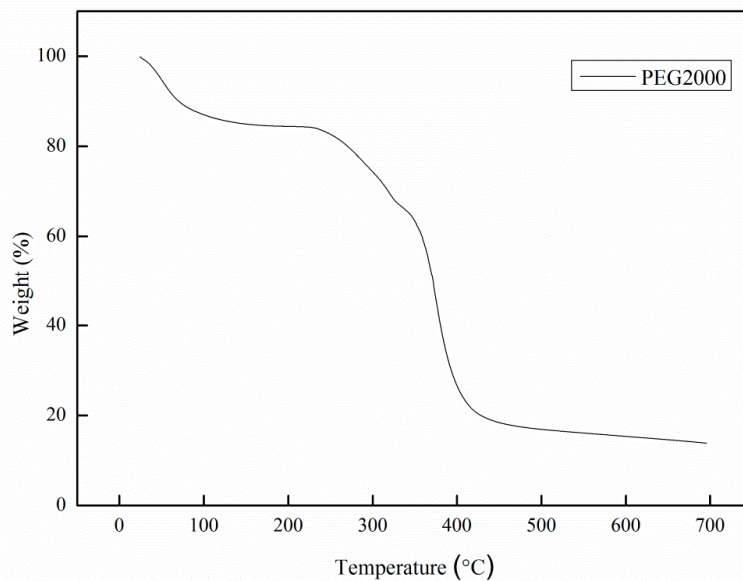

Figure S1. Thermogravimetric curve of hydrogels with PEG2000.

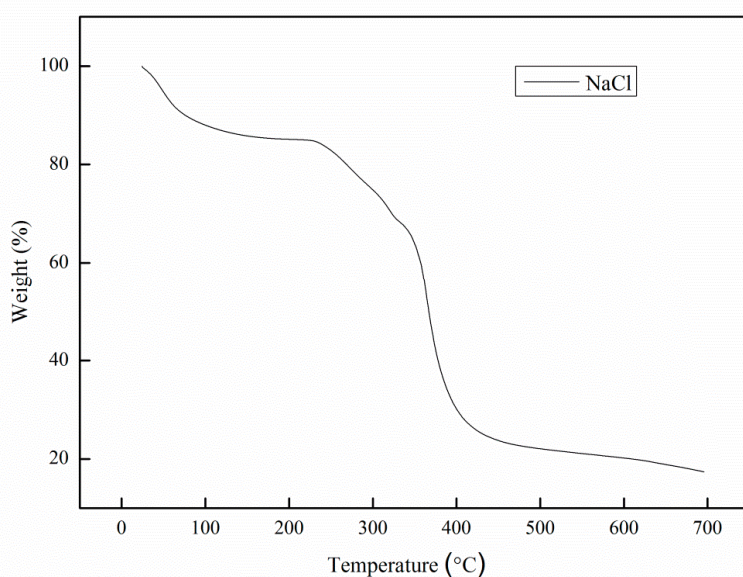

Figure S2. Thermogravimetric curve of hydrogels with NaCl.

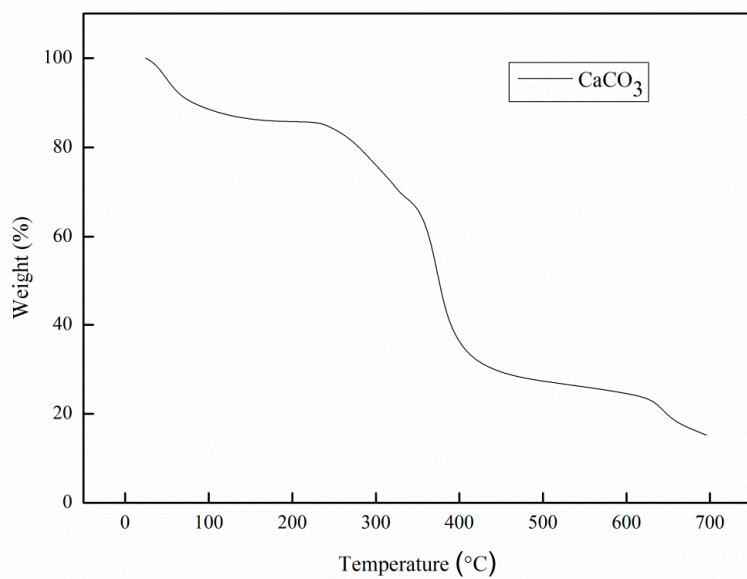

**Figure S3.** Thermogravimetric curve of hydrogels with  $\text{CaCO}_3$ .

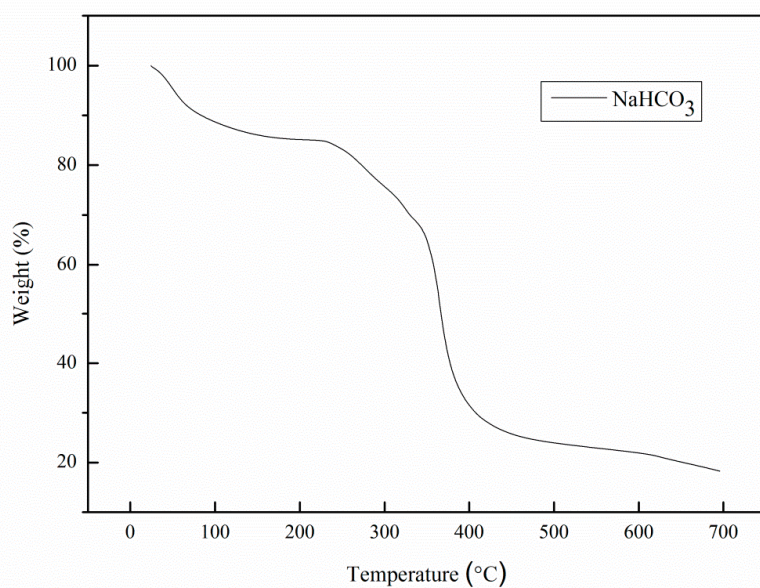

**Figure S4.** Thermogravimetric curve of hydrogels with  $\text{NaHCO}_3$ .

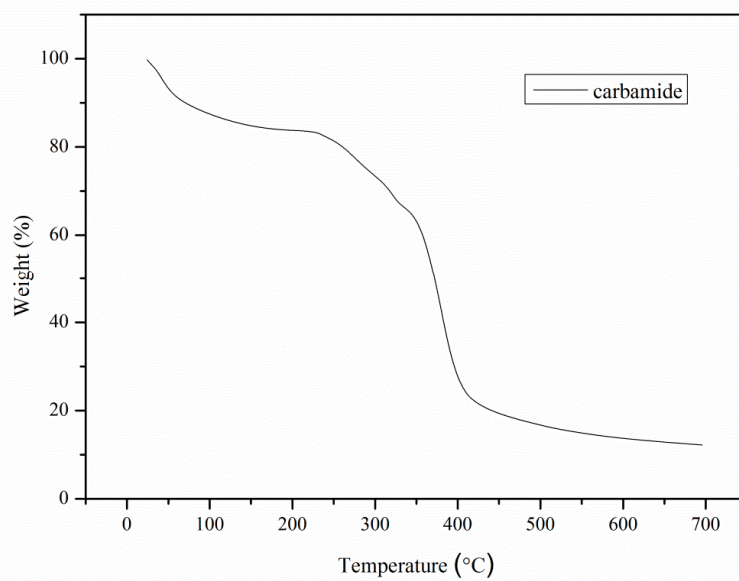

**Figure S5.** Thermogravimetric curve of hydrogels with carbamide.

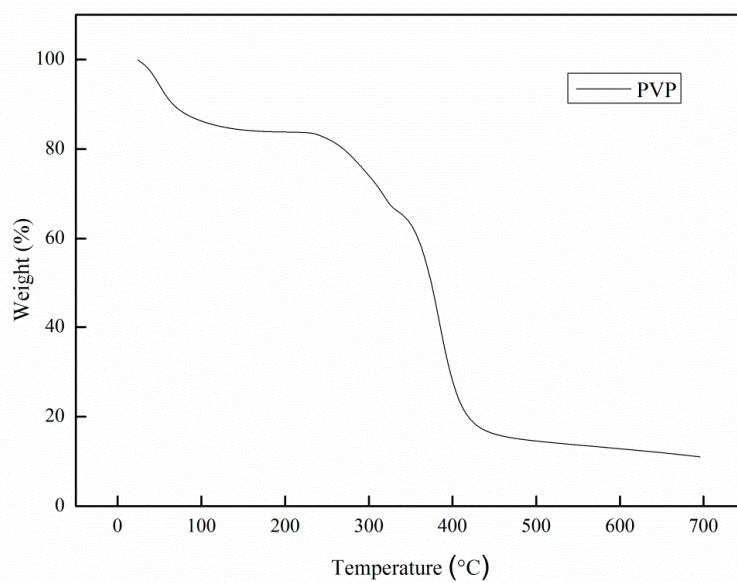

**Figure S6.** Thermogravimetric curve of hydrogels with PVP.

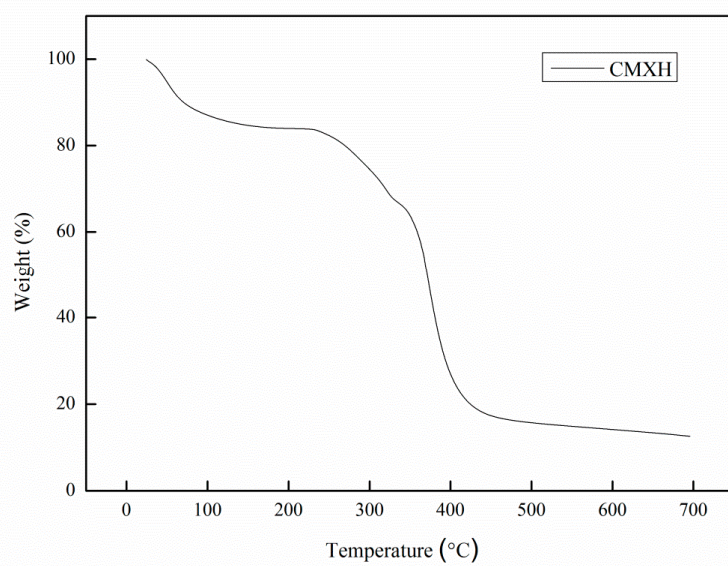

**Figure S7.** Thermogravimetric curve of hydrogels without pore-forming agents.
